# Supplementary material for: The crystal structure of launayite from Taylor Pit, Madoc, Ontario, Canada: crystal chemistry, modulated superstructures, and parent modular structure compared with rouxelite
Source: Copernicus journal article supplement (doi:10.5194/ejm-37-971-2025), 2025-12-19
Supplement: Supplementary file [file ejm-37-971-2025-supplement-title-page.pdf › ejm-37-971-2025-supplement-title-page.pdf]

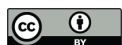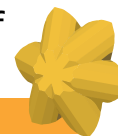

*Supplement of*

**The crystal structure of launayite from Taylor Pit, Madoc, Ontario, Canada: crystal chemistry, modulated superstructures, and parent modular structure compared with rouxelite**

**Dan Topa et al.**

*Correspondence to:* Dan Topa ([dan.topa@nhm-wien.ac.at](mailto:dan.topa@nhm-wien.ac.at))

- [ejm-37-971-2025-supplement-title-page.pdf](#)
- [S1 launayite.cif](#)
- [S2 checkcif.pdf](#)

The copyright of individual parts of the supplement might differ from the article licence.
